# Supplementary material
Source: PubMed Central journal article supplement (PMC7474655)
Supplement: pnas.1922216117.sapp.pdf [file pnas.1922216117.sapp.pdf]

# PNAS

[www.pnas.org](http://www.pnas.org)

Supporting Information for

**Global epigenomic analysis of KSHV-infected primary effusion lymphoma identifies functional MYC super-enhancers and enhancer RNAs**

Angela Park<sup>1</sup>, Soohwan Oh<sup>2,3</sup>, Kyle L. Jung<sup>1</sup>, Un Yung Choi<sup>1</sup>, Hye-Ra Lee<sup>4</sup>, Michael G. Rosenfeld<sup>3\*</sup> and Jae U. Jung<sup>1\*</sup>

\*Corresponding authors:

**Jae U. Jung**

Email: [jaeujung@med.usc.edu](mailto:jaeujung@med.usc.edu)

**Michael G. Rosenfeld**

Email: [mrosenfeld@ucsd.edu](mailto:mrosenfeld@ucsd.edu)

**This PDF file includes:**

Figures S1 to S3

Tables S1 to S3

## Supplementary Information

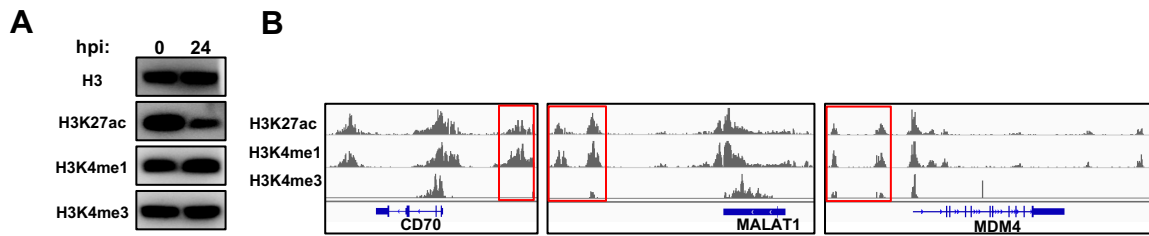

**Fig. S1.** (A) Immunoblot analysis of total H3 and H3 modification levels in TRExBCBL1-RTA cells during latency and lytic replication (induced by doxycycline for 24 h). (B) Three strongest super-enhancers (red box) in TRExBCBL1-RTA cells during latency showing high levels of H3K27ac and H3K4me1 ChIP-seq signals relative to H3K4me3 signals.

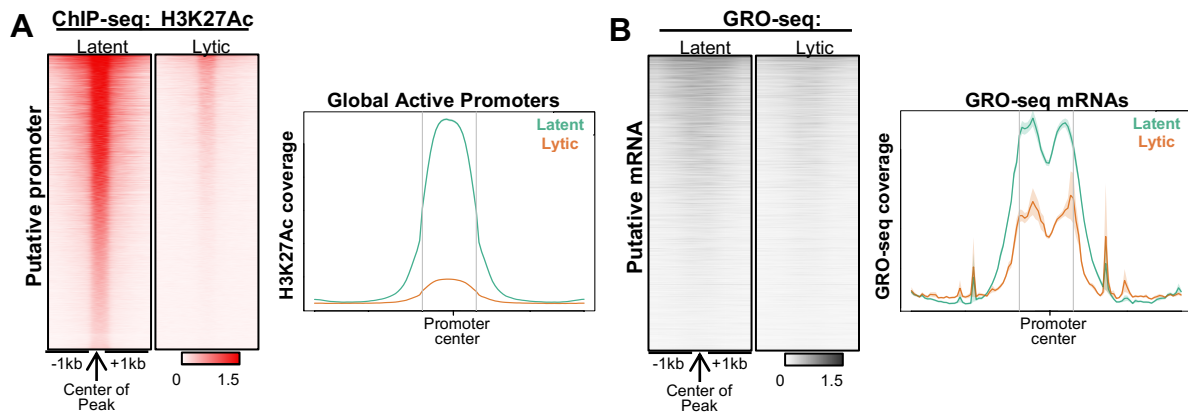

**Fig. S2.** (A) Left: Heatmap of H3K27ac ChIP-seq signals at putative active promoters in TRExBCBL1-RTA cells during latency and lytic replication induced by doxycycline for 24 h; each row represents one promoter region. Right: Density plot of average ChIP-seq signals in 10 kb windows around the center of promoter of KSHV latent-infected (green) or lytic-infected (orange) cells. (B) Left: Heatmap of GRO-seq signals at putative active promoters identified in A. Right: Density plot of average GRO-seq signals in 10kb windows around the center of promoter of KSHV latent-infected (green) or lytic-infected (orange) cells.

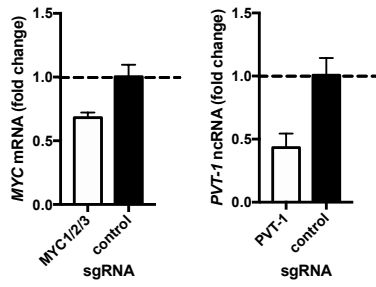

**Fig. S3.** CRISPRi-mediated depletion. dCas9-KRAB-MYC-sgRNA or dCas9-KRAB-PVT1-sgRNA was used to test system efficacy in TReXBCBL1-RTA cells. 3 different sgRNAs were mixed to repress *MYC* mRNA.

**Table S1.** Primers used for qPCR assays.

| <b>Primer name</b>   | <b>Fwd</b>             | <b>Rev</b>              | <b>Assay</b>              |
|----------------------|------------------------|-------------------------|---------------------------|
| <b>18S</b>           | TTCGAACGTCTGCCCTATCAA  | GATGTGGTAGCCGTTTCTCAGG  | RT-qPCR                   |
| <b>MYC</b>           | AGAGTTTCATCTGCGACCCG   | AAGCCGCTCCACATACAGTC    | RT-qPCR                   |
| <b>MYC_e486</b>      | GCCCTGTGAAACCTAATGACA  | AAGAGGGCATGGAGAGTGATT   | RT-qPCR, ChIP-qPCR, ddPCR |
| <b>MYC_e507</b>      | CCCACCGTGATTCTGAGG     | CACACCCAAGACTGGGAAG     | RT-qPCR, ChIP-qPCR, ddPCR |
| <b>MYC_e530</b>      | GAATCCATTCAGCCTTTGCT   | TCTGTCCTCCTTGGGCTCT     | RT-qPCR, ChIP-qPCR, ddPCR |
| <b>LANA</b>          | GAGTCTGGTGACGACTTGGAG  | AGGAAGGCCAGACTCTTCAAC   | RT-qPCR                   |
| <b>RTA</b>           | TTGCCAAGTTTGTACAAGTCTG | ACCTTGCAAAGACCATTTCAGAT | RT-qPCR                   |
| <b>K2</b>            | TCACTGCGGGTTAATAGGATTT | CATGACGTCCACGTTTATCACT  | RT-qPCR                   |
| <b>ORF 25</b>        | ACAGTTTATGGCACGCATAGTG | GGTTCTCTGAATCTCGTCGTGT  | RT-qPCR                   |
| <b>cellular IRF4</b> | GGCCAGAGGAAAAACATTGA   | ATCCTGCTCTGGCACAGTCT    | RT-qPCR                   |
| <b>viral IRF4</b>    | GAGCTCCTCAACCAGACAGG   | GCTGACTATCAGGGGGATCA    | RT-qPCR                   |
| <b>PANRNA</b>        | GAATCCATTCAGCCTTTGCT   | TCTGTCCTCCTTGGGCTCT     | RT-qPCR, ddPCR            |

**Table S2.** Primers used for 3C & 4C-seq assays.

| <b>Primer name</b>    | <b>Fwd</b>                                          | <b>Rev</b>                                    |
|-----------------------|-----------------------------------------------------|-----------------------------------------------|
| <b>3C-e486</b>        | CAGCCGAGCACTCTAGCTCT                                | CCAAAGCACTGACACCTGTG                          |
| <b>3C-e507</b>        | CAGCCGAGCACTCTAGCTCT                                | AGGTTGGCCAGCATAGACAC                          |
| <b>3C-e530</b>        | CAGCCGAGCACTCTAGCTCT                                | CAGAAAGTCCCTCAAGGTGG                          |
| <b>4C-mycPromoter</b> | G TTCAGAGTTCTACAGTCCGACGATC<br>AGCTGCTGGGAGGAGACATG | AGACGTGTGCTCTTCCGATCT<br>CCACGTCCTAACACCTCTAG |
| <b>4C-mycEnhancer</b> | G TTCAGAGTTCTACAGTCCGACGATC<br>CTCATCTGCCGAAGCCTT   | AGACGTGTGCTCTTCCGATCT<br>CTGCTGCTCATTGCATAATG |

**Table S3.** shRNA and sgRNA sequence.

| <b>Primer name</b> | <b>Fwd</b>            | <b>Rev</b>            |
|--------------------|-----------------------|-----------------------|
| <b>shRNA-e486</b>  | GGAGGACATGACAGCAGAAGT | ACTTCTGCTGTCATGTCCTCC |
| <b>shRNA-e507</b>  | GCCTGCCACATAACATCAATC | GATTGATGTTATGTGGCAGGC |
| <b>shRNA-e530</b>  | GCTCTGCTTTGCTAGTTATCT | AGATAACTAGCAAAGCAGAGC |
| <b>sgRNA-e486</b>  | GCTTACAAGCCACAGTGTC   | ACCCCGCAAGTTTCATAGA   |
| <b>sgRNA-e507</b>  | GGAGTCACAATACATTGGAG  | CAGCCTATGGATGCAAGCTA  |
| <b>sgRNA-e530</b>  | CACCACGTAACCTTCCACCT  | ATCCACTGGCAACCATTAC   |
| <b>sgRNA-MYC1</b>  | GCGAAGCCCCCTATTCGCTC  | CGAAAACCGGCTTTTATACT  |
| <b>sgRNA-MYC2</b>  | AGGACGCGACTCTCCCGACG  | TCGCATTATAAAGGGCCGGT  |
| <b>sgRNA-MYC3</b>  | AGCTATCCCCTAAAGCGGCT  | GCTATCTCGGAGACGCACTT  |
| <b>sgRNA-PVT1</b>  | TCCTCCGGGCAGAGCGCGTG  | CCACACGCGCTCTGCCCGGA  |
